# Supplementary material for: Landscape of in vivo Fitness-Associated Genes of Enterobacter cloacae Complex
Source: Front Microbiol. 2020 Jul 10;11:1609. doi: 10.3389/fmicb.2020.01609 (PMC7365913; doi:10.3389/fmicb.2020.01609)
Supplement: TABLE S6 — Tn insertion mutants with a positive phenotype for larvae of G. mellonella colonization (changes > +10-fold). [file Table_6.xls]

## Sheet: FC+>10
TABLE S6 Tn insertion mutants with a positive phenotype for larvae of G. mellonella colonization (changes > +10-fold).
Feature ID	Product	LB-RPKM	T48 - RPKM	Fold Change T48/LB		start	stop	Size
ECL_02046	putative catalase	36.4787	4543.36	124.548		2080329	2081202	873
ECL_00417	pilin accessory protein PilO	8.63033	1044.88	121.07		433028	434135	1107
ECL_04444	Opacity protein and surface antigens-like protein	18.6233	1994.27	107.084		4551366	4552050	684				genes selected for the construction of the mutant strains
ECL_01883	sodium:citrate symporter family protein	91.0568	9721.24	106.76		1912057	1913386	1329
ECL_01143	diguanylate cyclase AdrA	109.615	11562.3	105.481		1177073	1178177	1104				genes mentioned in the manuscript
ECL_04949	hypothetical protein	113.92	11231	98.5864		5070188	5070803	615
ECL_01412	methyl-accepting chemotaxis sensory transducer	7.63691	735.518	96.311		1431912	1433580	1668
fliM_2	Flagellar motor switch protein fliM	20.8458	1730.11	82.9955		3348576	3349569	993
ECL_00272	putative transcriptional regulator	5.5288	440.677	79.7056		282882	283170	288
ECL_00095	putative transcriptional regulatory protein	82.4295	6205.3	75.2802		94505	95297	792
ECL_04945	biotin--protein ligase	8.26737	525.022	63.5053		5060616	5061579	963
ECL_02003	PhzF family phenazine biosynthesis protein	2.01047	115.95	57.6732		2040201	2040993	792
ECL_04180	LysR family transcriptional regulator	1.83656	92.8289	50.545		4298018	4298885	867
ECL_04071	NifA subfamily transcriptional regulator	73.7387	2402.13	32.5762		4174253	4176326	2073
ECL_02706	aliphatic sulfonates transport ATP-binding subunit	4.13047	133.83	32.4007		2747039	2747810	771
ECL_03893	two-component system, NtrC family, sensor histidine kinase YfhK	85.1988	2549.36	29.9225		3982793	3984176	1383
ECL_03524	3-demethylubiquinone-9 3-methyltransferase	37.1317	1109.68	29.8848		3612975	3613704	729
ECL_04028	putative inner membrane protein	7.69225	206.864	26.8926		4133725	4134139	414
ECL_02585	lipid A biosynthesis lauroyl acyltransferase	8.58843	230.408	26.8277		2628044	2628971	927
ECL_02749	formate transporter	90.9353	2429.25	26.714		2795739	2796597	858
ECL_00515	hypothetical protein	12.3434	327.946	26.5685		513018	513147	129
ECL_04148	prepilin peptidase-dependent protein B	22.5858	590.923	26.1635		4262371	4262935	564
ECL_00174	putative glutathione S-transferase	41.8337	1023.36	24.4625		168443	169052	609
ECL_04650	Cation/multidrug efflux pump	55.7355	1332.7	23.9111		4776492	4779606	3114
ECL_04078	putative inner membrane protein	9.95185	232.161	23.3285		4181256	4181736	480
ECL_04345	NADPH quinone reductase	51.9822	1191.39	22.9192		4458297	4458879	582
ECL_03012	citrate synthase	473.72	10624.5	22.4277		3061521	3062805	1284
ECL_00899	hypothetical protein	62.0653	1377.16	22.1889		900916	901660	744
ECL_01651	hypothetical protein	11.7948	249.677	21.1684		1676952	1677357	405
ECL_02167	hypothetical protein	13.5619	265.248	19.5582		2215334	2217917	2583
ECL_03396	hypothetical protein	4.71791	91.7181	19.4404		3462682	3463357	675
ECL_03605	EaC protein	20.7128	387.565	18.7114		3680192	3680807	615
ampH	beta-lactam binding protein AmpH	281.074	5136.16	18.2733		1167483	1168650	1167
tig	trigger factor tig	13.4836	245.447	18.2033		1227012	1228311	1299
ECL_00221	hypothetical protein	328.569	5814.27	17.6957		219131	219257	126
ECL_04304	hypothetical protein	2.23011	39.0187	17.4964		4414718	4415432	714
ECL_01973	hypothetical protein	2.72187	44.0952	16.2003		2010086	2010671	585
ECL_02540	4-amino-4-deoxychorismate lyase	74.7003	1185.97	15.8763		2589479	2590289	810
ECL_02184	hypothetical protein	14.6082	217.725	14.9043		2233757	2234084	327
ECL_02456	hypothetical protein	2.57653	38.4014	14.9043		2505299	2505917	618
ligB	NAD-dependent DNA ligase ligB	58.1269	853.991	14.6918		115296	116967	1671
ECL_03505	putative hydrolase	9.11968	132.377	14.5155		3586778	3587651	873
ECL_01935	hypothetical protein	47.1791	672.6	14.2563		1969306	1969441	135
ECL_04040	PTS system, glucitol/sorbitol-specific IIB component	9.95185	141.876	14.2563		4145554	4146514	960
ECL_03990	LysR family transcriptional regulator	7.1725	101.091	14.0943		4096663	4097551	888
ECL_03558	hypothetical protein	94.7795	1326.64	13.9971		3649361	3649613	252
ECL_02193	allophanate hydrolase	41.5766	566.933	13.6359		2241000	2242800	1800
ECL_02272	DNA replication terminus site-binding protein	8.56073	112.059	13.0899		2326142	2327072	930
ECL_01640	peptide/nickel transport system ATP-binding component	7.85156	98.7055	12.5715		1667957	1668971	1014
ECL_01305	DNA replication protein gp18	225.795	2783.85	12.3291		1335299	1336385	1086
ECL_02197	ABC transporter ATP-binding protein	2.04929	25.2313	12.3123		2247912	2248689	777
ECL_00138	ADP-heptose--LPS heptosyltransferase	202.273	2489.39	12.3071		136275	137259	984
ECL_01419	flagellar biosynthesis protein FlhA	9.95664	120.107	12.063		1439506	1441585	2079
ECL_03891	two-component system, NtrC family, response regulator YfhA	34.5116	406.408	11.776		3980730	3982068	1338
ECL_04000	hypothetical protein	11.245	128.979	11.4698		4107418	4108834	1416
ECL_00467	arsenical pump-driving ATPase	40.5508	459.564	11.333		476124	477891	1767
cheA	chemotaxis protein CheA	8.25451	92.5383	11.2106		3318330	3320259	1929
ECL_00939	putative fimbrial protein	22.0006	245.928	11.1782		944385	944964	579
ECL_01650	hypothetical protein	8.56073	94.3069	11.0162		1676183	1676927	744
ECL_00290	maltose ABC transporter periplasmic protein	28.0757	305.823	10.8928		301349	302540	1191
ECL_03976	hypothetical protein	13.4032	144.178	10.757		4071265	4071859	594
ECL_03850	hypothetical protein	7.1725	74.366	10.3682		3934746	3934968	222
ECL_00865	transcriptional regulator SgrR	12.4999	128.979	10.3184		864343	865999	1656
